# Supplementary material for: Polymerization inspired synthesis of MnO@carbon nanowires with long cycling stability for lithium ion battery anodes: growth mechanism and electrochemical performance
Source: Royal Society of Chemistry journal article supplement (doi:10.1039/d0dt03540h), 2020-11-16
Supplement: d0dt03540h1.pdf [file d0dt03540h1.pdf]

# Supporting Information

## **Polymerization Inspired Synthesis of MnO@Carbon Nanowires with Long Cycling Stability for Lithium Ion Battery Anode: Growth Mechanism and Electrochemical Performance**

Fang Zhou<sup>†</sup>, Shuangfu Li<sup>†</sup>, Kai Han <sup>\*</sup>, Yajuan Li <sup>\*</sup>, You-Nian Liu

Hunan Provincial Key Laboratory of Efficient and Clean Utilization of Manganese

Resources, College of Chemistry and Chemical Engineering, Central South

University, Changsha 410083, Hunan, China

\*Corresponding Author Email: [kaihan@csu.edu.cn](mailto:kaihan@csu.edu.cn); [yajuanli@csu.edu.cn](mailto:yajuanli@csu.edu.cn)

<sup>†</sup>These two authors contributed equally.

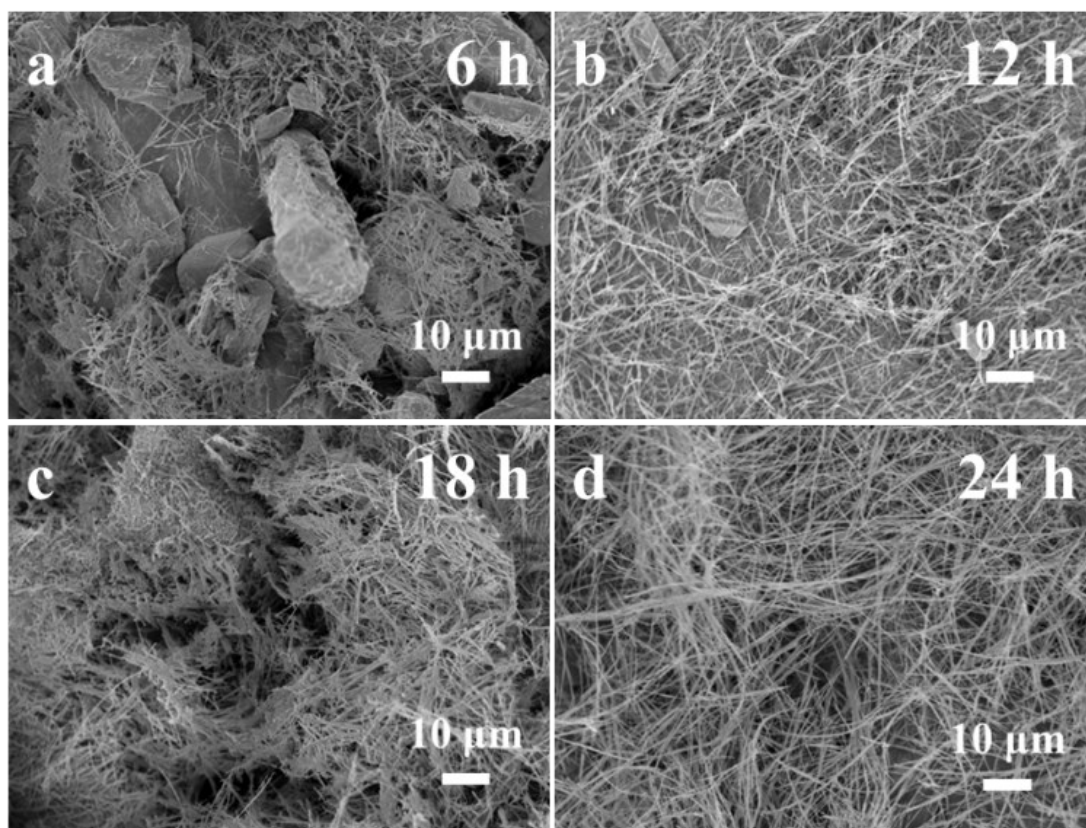

**Fig S1.** SEM images of [Mn-NTA] with the ratio of  $\text{MnCl}_2$  to NTA were 2:1 (a) 6 h, (b) 12 h, (c) 18 h and (d) 24 h.

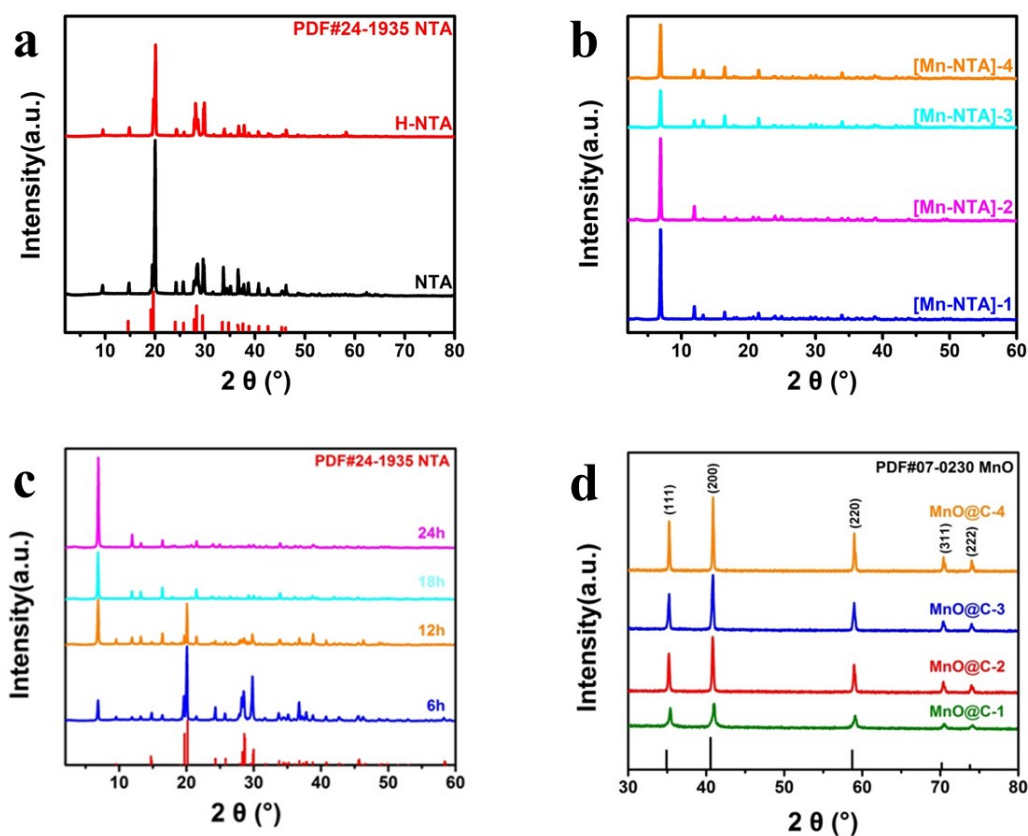

**Fig. S2.** (a) XRD pattern of [Mn-NTA] nanowires with different hydrothermal reaction time at 2:1 Mn to NTA ratio. (b) XRD pattern of [Mn-NTA] nanowires with different MnCl<sub>2</sub> to NTA ratio. (c) XRD pattern of H-NTA and NTA. (d) XRD patterns of MnO@C with the different ratios of MnCl<sub>2</sub> to NTA.

**Table S1.** The length distribution of the nanowires produced by MnCl<sub>2</sub> and NTA with different molar ratio

| MnCl <sub>2</sub> :NTA | Sample     | Length/ $\mu\text{m}$ |
|------------------------|------------|-----------------------|
| 1:1                    | [Mn-NTA]-1 | 60~80                 |
| 2:1                    | [Mn-NTA]-2 | $\geq 100$            |
| 3:1                    | [Mn-NTA]-3 | 30~50                 |
| 4:1                    | [Mn-NTA]-4 | $\leq 30$             |

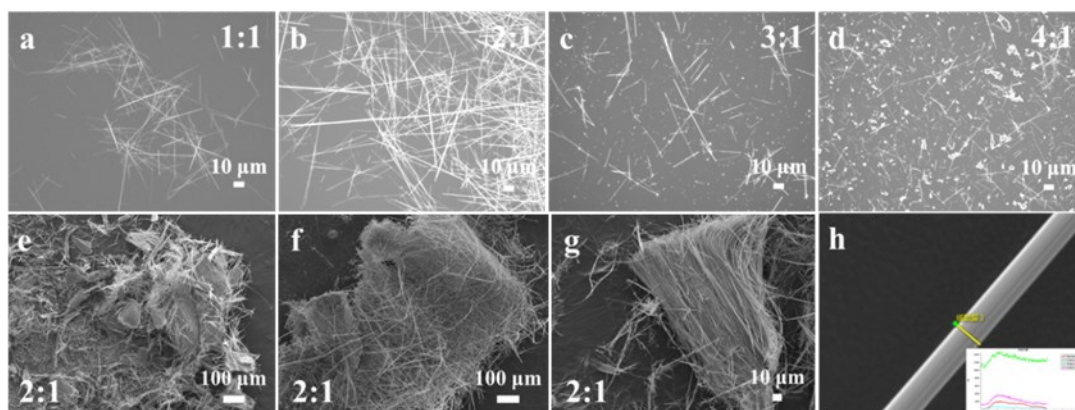

**Fig S3.** SEM images of [Mn-NTA] nanowires with Mn to NTA ratio (a) 1:1, (b) 2:1, (c) 3:1 and (d) 4:1. (e), (f), (g) and (h) low-resolution SEM of [Mn-NTA]-

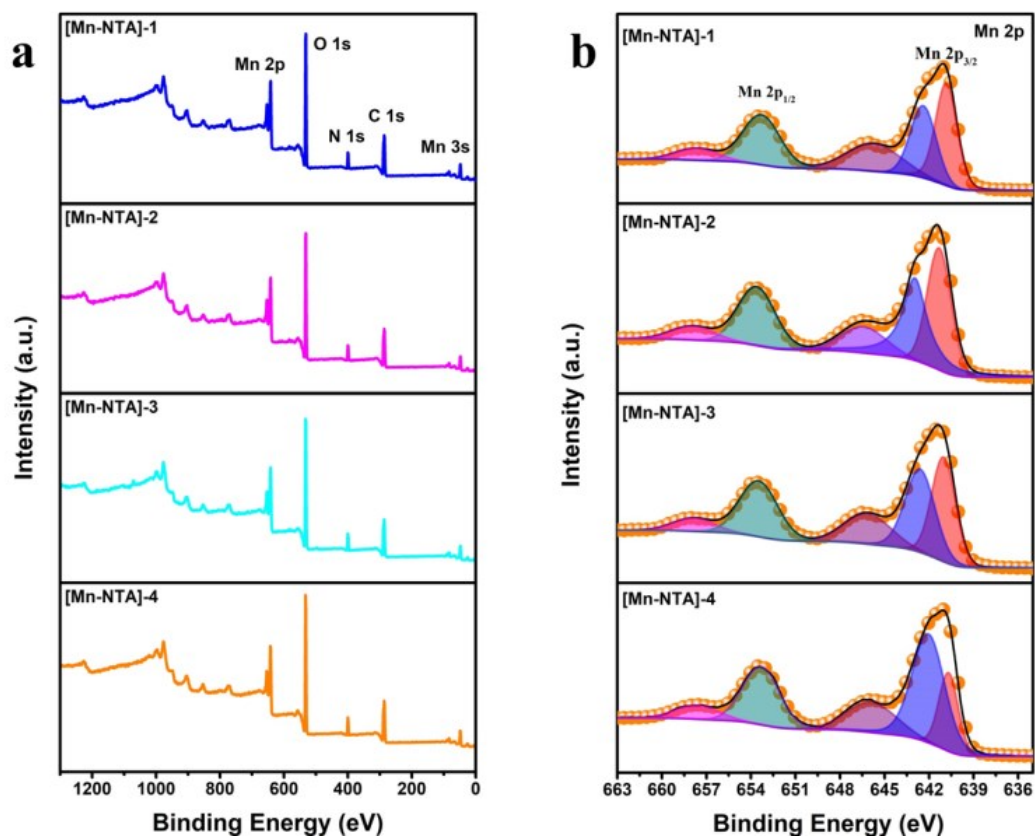

**Fig S4.** (a) The full XPS spectra of [Mn-NTA] nanowires. (b) High-resolution XPS spectra Mn 2p of [Mn-NTA] nanowires.[Zou, 2020 #202]

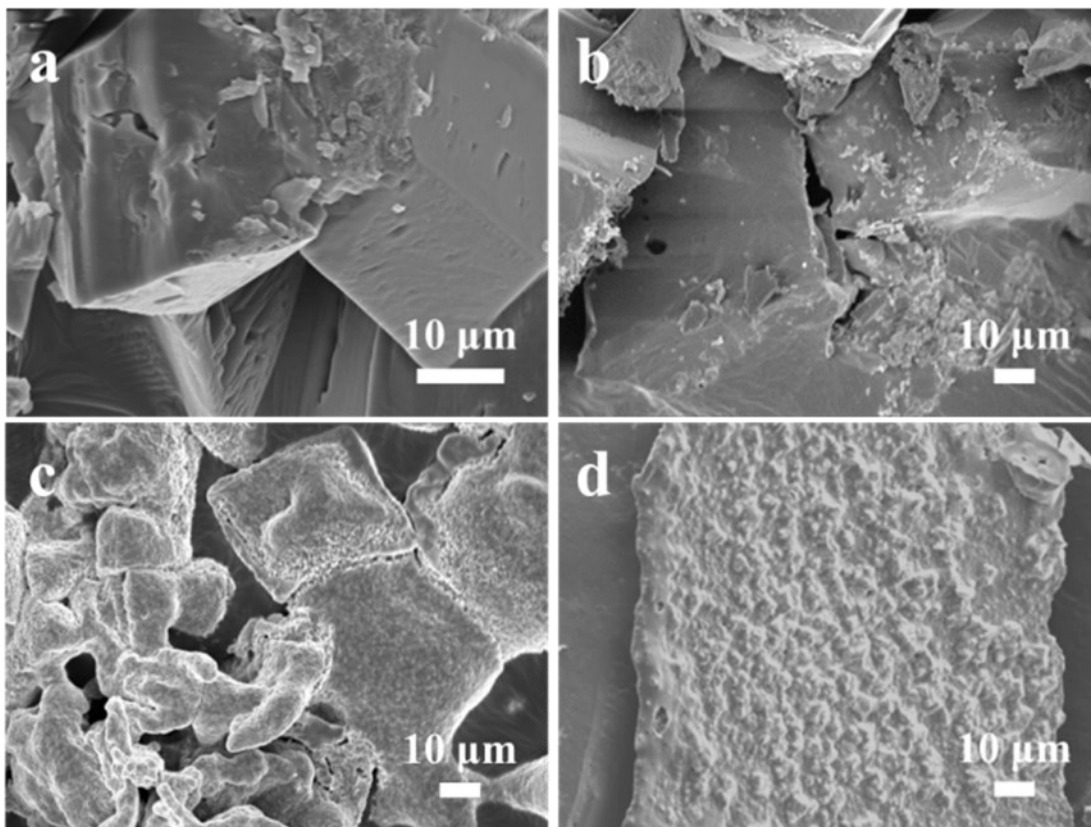

**Fig. S5.** SEM images of (a) raw material of NTA, (b) hydrothermal ammonium of NTA, (c) raw material of  $\text{MnCl}_2$ , (d) hydrothermal ammonium of Mn

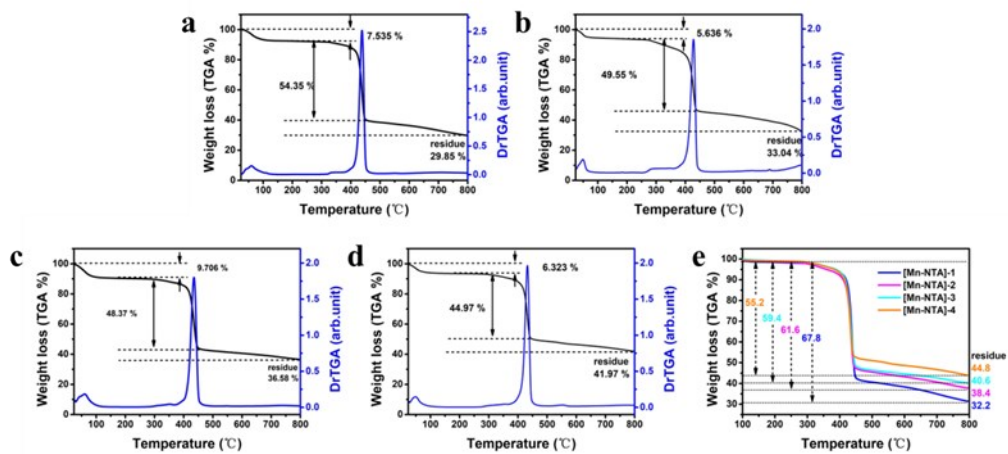

**Fig S6.** TGA patterns of (a) [Mn-NTA]-1, (b) [Mn-NTA]-2, (c) [Mn-NTA]-3 and (d) [Mn-NTA]-4. (e) TGA pattern of [Mn-NTA] nanowires with moisture removal.



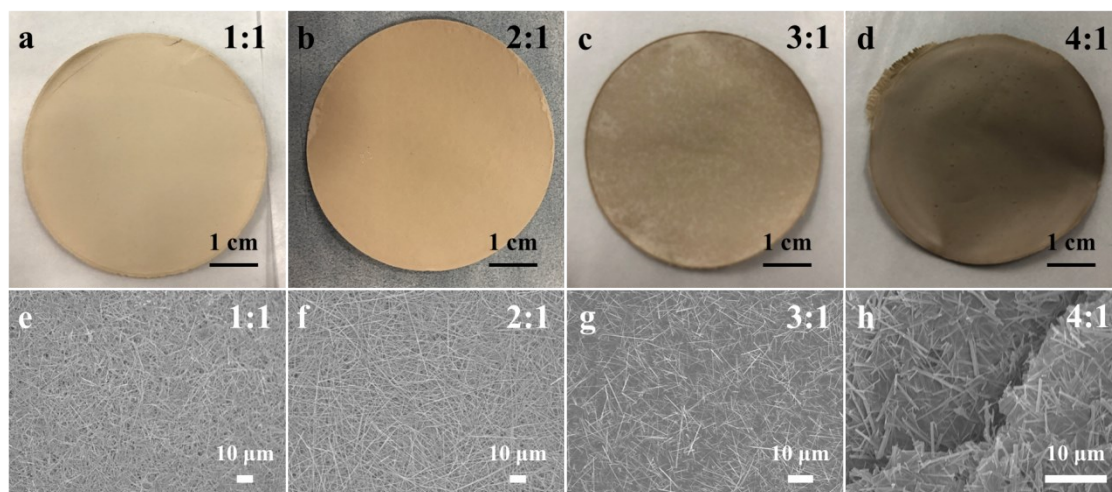

**Fig S7.** Digital photos of [Mn-NTA]/ GO paper prepared at the different ratio of MnCl<sub>2</sub> to NTA with the same reaction time of 24 h (a) 1:1, (b) 2:1, (c) 3:1, (d) 4:1. SEM images of MnO@C/rGO electrodes prepared at the different ratio of MnCl<sub>2</sub> to NTA with the same reaction time of 24 h (e) 1:1, (f) 2:1, (g) 3:1, (h) 4:1.

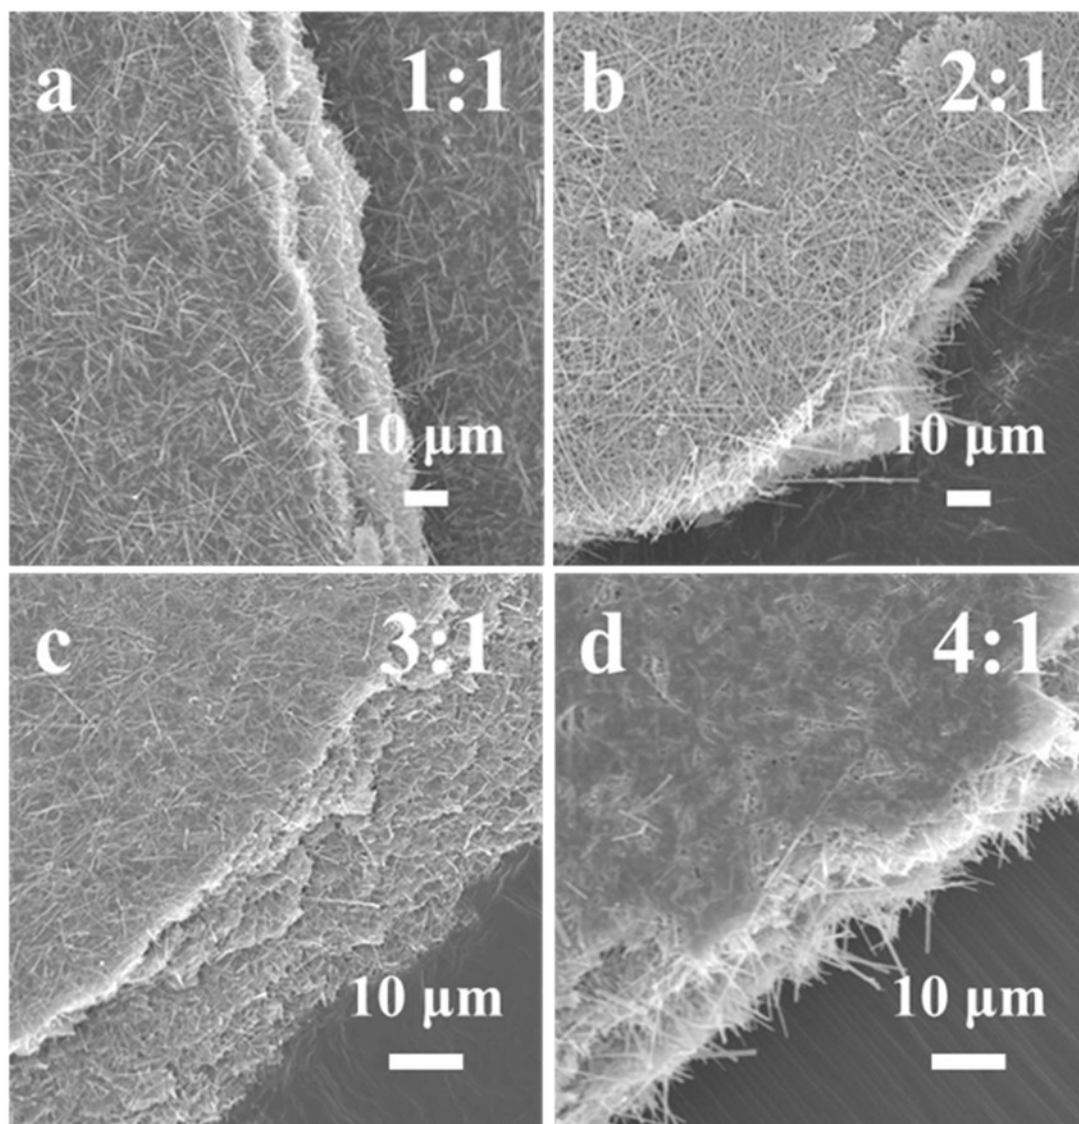

**Fig S8.** Cross section SEM images of free-standing MnO@C/rGO electrodes prepared at the different ratio of MnCl<sub>2</sub> to NTA with the same reaction time of 24 h (a) 1:1, (b) 2:1, (c) 3:1, (d) 4:1.

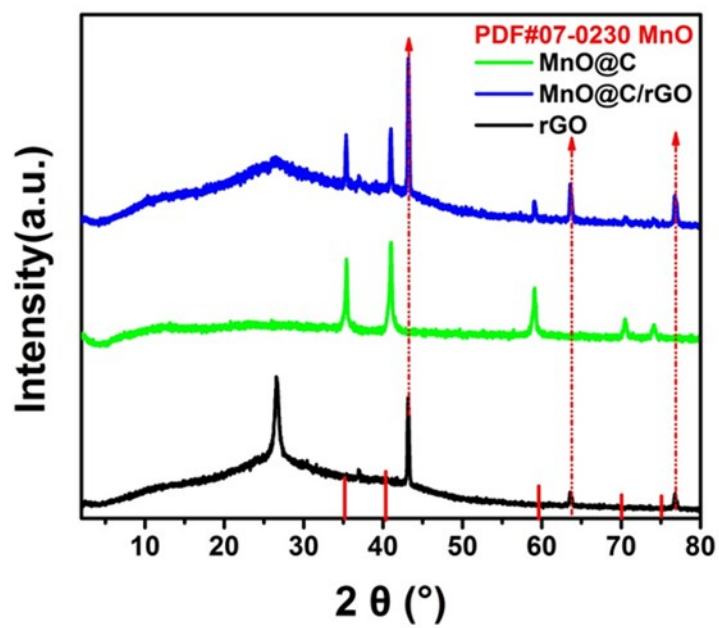

Fig S9. XRD pattern of rGO, MnO@C and MnO@C/rGO

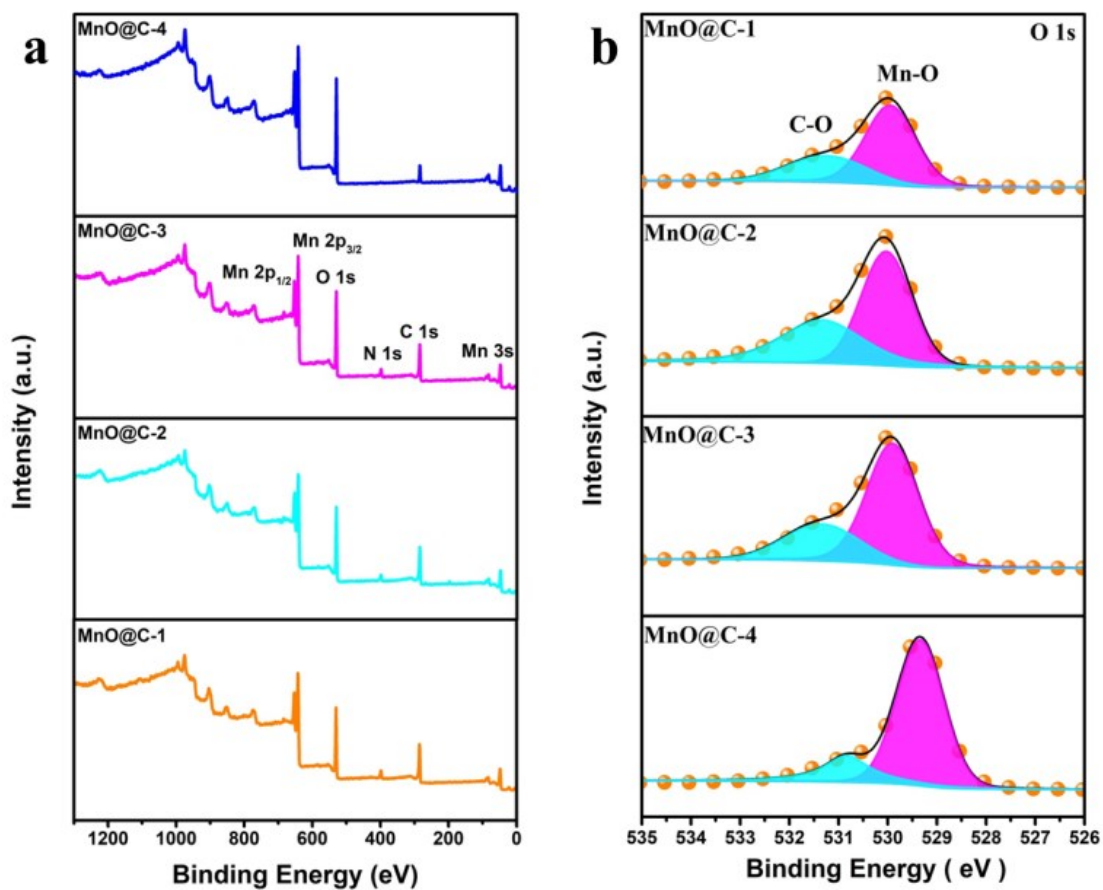

**Fig S10.** (a) The full XPS spectra of MnO@C. (b) High-resolution XPS spectra O 1s of MnO@C

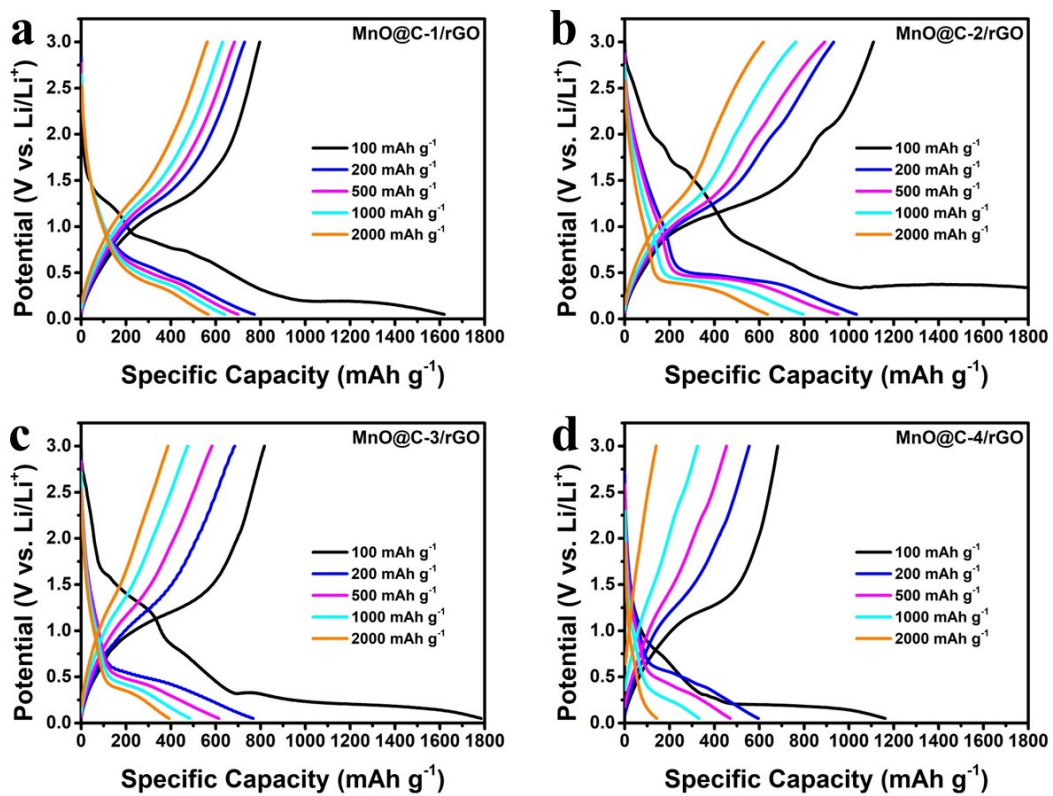

**Fig S11.** Galvanostatic discharging/charging voltage profiles of (a) MnO@C-1/rGO, (b) MnO@C-2/rGO, (c) MnO@C-3/rGO, (d) MnO@C-4/rGO.

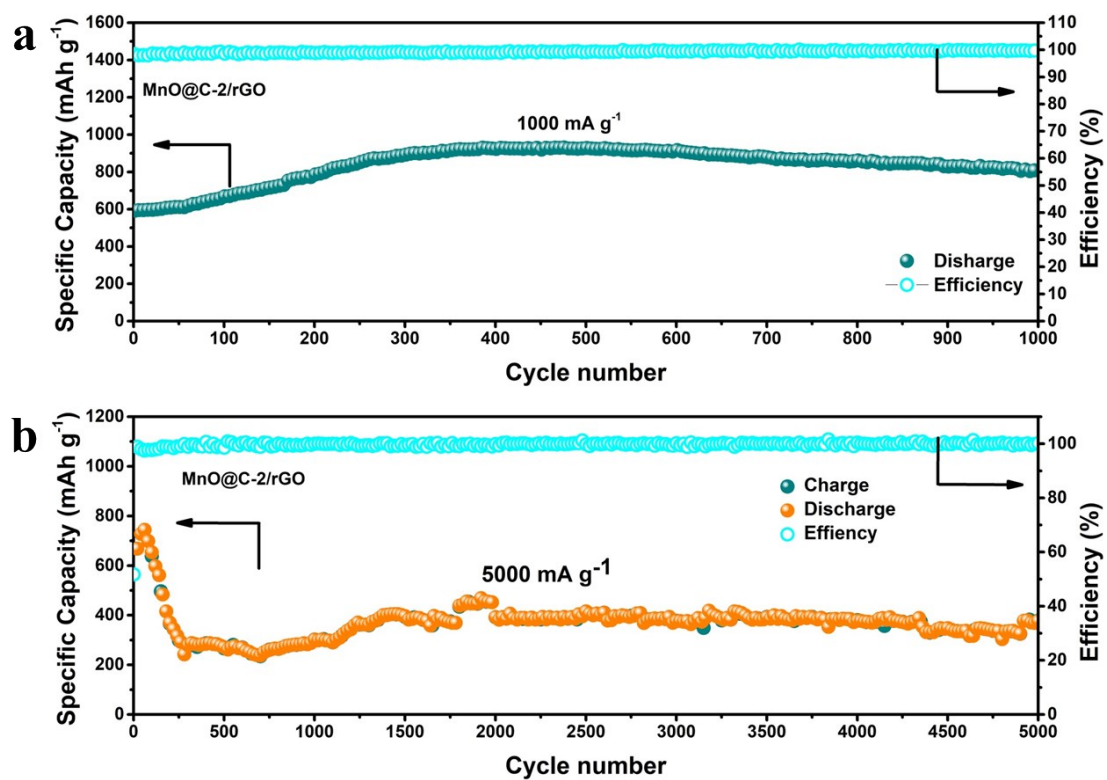

**Fig S12.** Cycling performances of MnO@C-2/rGO (a) 1000 mAh g<sup>-1</sup> and (b) 5000 mAh g<sup>-1</sup>.

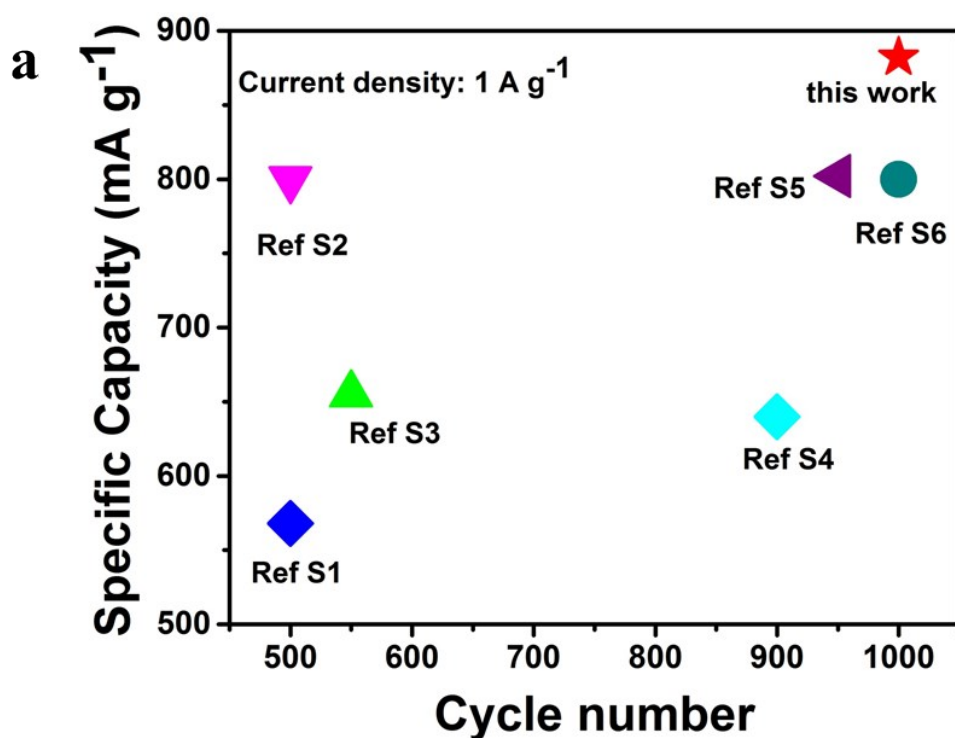

**Fig S13.** The performance comparison of MnO@C-2/rGO with other high performance anodes used in lithium-ion batteries.

- [1] Q. Ye, J. Ru, J. Peng, G. Chen, D. Wang, *Chem. Eng. J.* 331 (2018) 570-577.
- [2] J. Lin, L. Yu, Q. Sun, F. Wang, Y. Cheng, S. Wang, X. Zhang, *International Journal of Hydrogen Energy* 45 (2020) 1837-1845.
- [3] S. Huang, H. Li, G. Xu, X. Liu, Q. Zhang, L. Yang, J. Cao, X. Wei, *Electrochim. Acta* 342 (2020) 136115.
- [4] J. Yu, J.-D. Luo, H. Zhang, Z. Zhang, J. Wei, Z. Yang, *Electrochimica Acta* 322 (2019) 134757.
- [5] J.-D. Luo, H. Zhang, X.-T. Qi, J. Yu, Z. Zhang, J.-C. Wei, Z.-Y. Yang, *Carbon* 162 (2020) 36-45.
- [6] S. Tao, B. Li, J. Zhang, P. Cui, D. Wu, W. Chu, B. Qian, L. Song, *Chem. Commun.* 55 (2019) 9184-9187

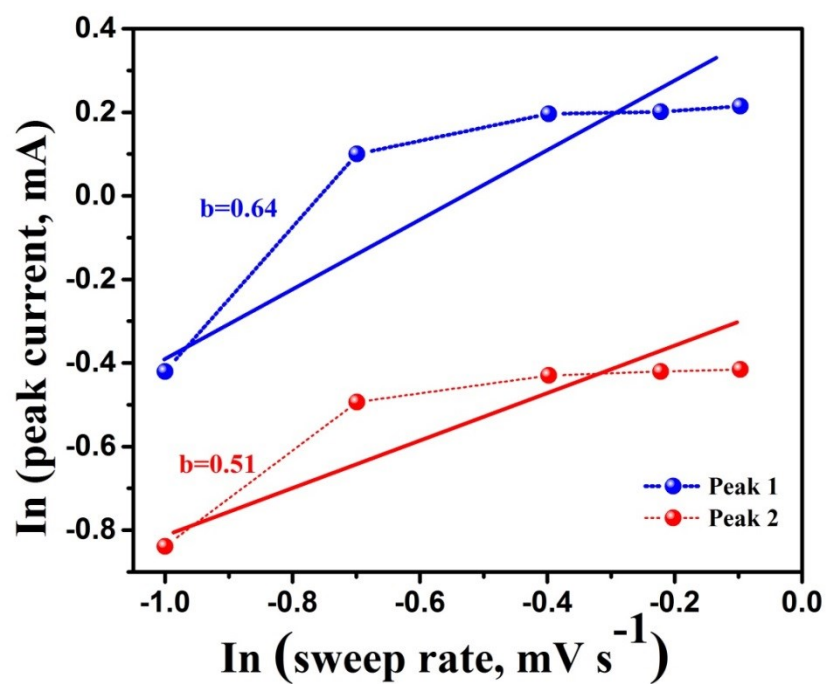

Fig S14. The  $b$ -value from plot of  $\log i$  versus  $\log v$  for anodic specific current peaks (of the sample MnO@C-1/rGO).



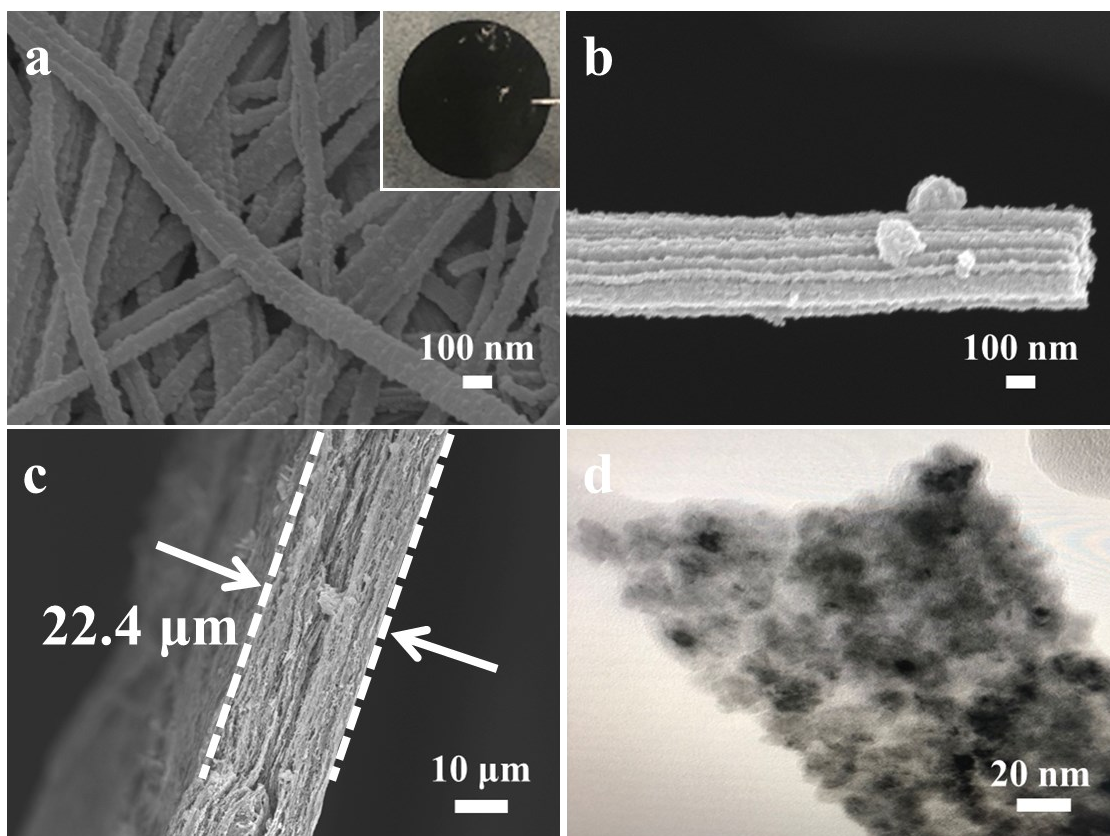

**Fig S15.** (a) High-resolution SEM image and digital photo of cycled MnO@C-2/rGO electrode. (b) High-resolution SEM image of single cycled MnO@C-2 nanowire. (c) Cross section SEM images of cycled MnO@C-2/rGO electrode. (d) TEM image of cycled MnO@C-2 nanowire

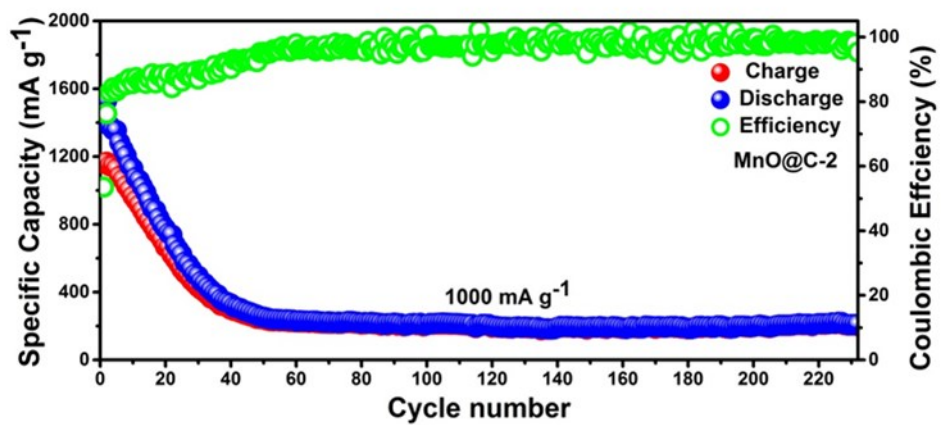

Fig S16. Cycling performances of MnO@C-2 at 1000 mAh g<sup>-1</sup>.

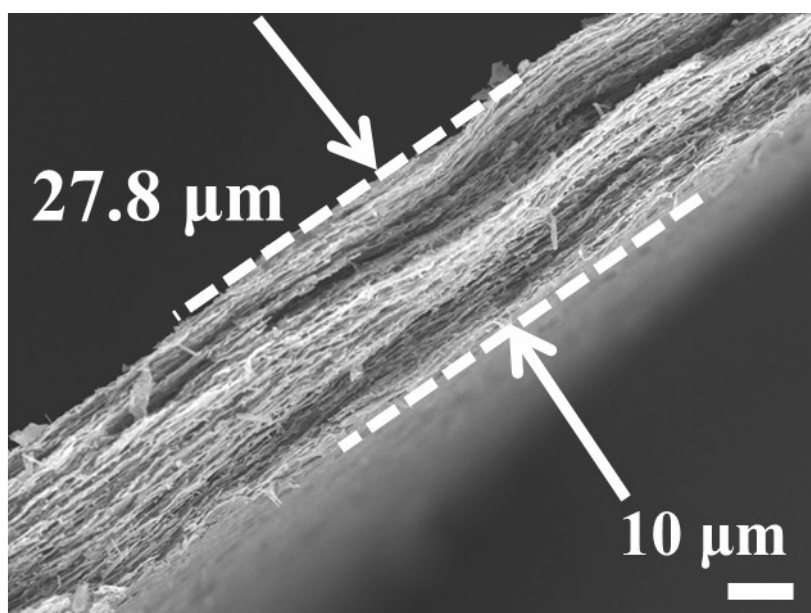

**Fig S17.** Cross section SEM images of fresh MnO@C-2/rGO electrode.
